# Supplementary material for: Sex Differences in Revascularization, Treatment Goals, and Outcomes of Patients With Chronic Coronary Disease: Insights From the ISCHEMIA Trial
Source: PubMed Central journal article supplement — J Am Heart Assoc. 2024 Feb 27;13(5):e029850. doi: 10.1161/JAHA.122.029850 (PMC10944079; doi:10.1161/jaha.122.029850), 2024-02-27
Supplement: JAH3-13-e029850-s001.pdf [file JAH3-13-e029850-s001.pdf]

# Supplemental Material

## Data S1.

### Supplemental Statistical Methods - Multiple Imputation of Baseline Covariates Used in Cox Modeling

#### Introduction

The purpose of this document is to document the methodological details for imputing missing data for the baseline covariates used in the Cox models in the ISCHEMIA trial.

#### Methods

The statistical techniques used for multiple imputation include chained equations and predictive mean matching (PMM). PMM using chained equations does not require too many assumptions and the imputations do not change much when those assumptions are violated<sup>1</sup>. PMM first involves fitting an ordinary linear model on an outcome variable using all covariates of interest. Predictions of the outcome variable can be determined based on the model where continuous covariates are expanded into restricted cubic splines that usually have 3 knots. For a given covariate, PMM then replaces a missing value with an observed value whose predicted value is very close to the predicted value for the missing value. PMM does not assume a conditional distribution form for the covariate being imputed.

The particular algorithm used to implement PMM uses Van Buuren's Type 1 matching<sup>39</sup> which incorporates uncertainty in matching an observed value to a missing value. This method does not find observed values using an exact match on predicted values, but instead uses weighted multinomial sampling of potential observed observations. The weight function that is used for the weighted multinomial sampling is Tukey's bicube function which gives heavy preference to observed values that are closest to the missing value's predicted value. The algorithm uses the bootstrap method to obtain the right amount of uncertainty instead of a Bayesian sampling approach that samples from the posterior distribution of imputation model parameters.

For the model that is used for multiple imputation, the outcome variable must be a study specific outcome variable when using baseline variables in the imputation model. This is done to avoid the situation where the final regression coefficients are biased towards zero. We include all event or censoring times and the corresponding indicators simultaneously when conducting the multiple imputation.

The multiple imputation algorithm used for ISCHEMIA makes 100 imputations for each missing value. The result is 100 sets of complete datasets of which values are averaged within each participant to get the final imputed covariates to be used in Cox proportional hazards regression modeling.

Table S1. Baseline Characteristics of Women and Men by Treatment Group.

| Characteristic                                     | Invasive Strategy Group |                     | P-value | Conservative Strategy Group |                     | P-value |
|----------------------------------------------------|-------------------------|---------------------|---------|-----------------------------|---------------------|---------|
|                                                    | Women (N=606)           | Men (N=1,982)       |         | Women (N=562)               | Men (N=2,029)       |         |
| <b>Demographics</b>                                |                         |                     |         |                             |                     |         |
| Age at Randomization (yrs.)                        |                         |                     | 0.288   |                             |                     | <.001   |
| N                                                  | 606                     | 1982                |         | 562                         | 2029                |         |
| Median (Q1, Q3)                                    | 65 (59, 71)             | 64 (58, 70)         |         | 65 (59, 72)                 | 64 (57, 70)         |         |
| Race                                               |                         |                     | 0.322   |                             |                     | 0.009   |
| American Indian or Alaskan Native                  | 2/602 (0.3%)            | 6/1,967 (0.3%)      |         | 1/552 (0.2%)                | 4/2,008 (0.2%)      |         |
| Asian                                              | 159/602 (26.4%)         | 588/1,967 (29.9%)   |         | 123/552 (22.3%)             | 615/2,008 (30.6%)   |         |
| Native Hawaiian or Other Pacific Islander          | 1/602 (0.2%)            | 4/1,967 (0.2%)      |         | 1/552 (0.2%)                | 6/2,008 (0.3%)      |         |
| Black or African American                          | 30/602 (5.0%)           | 66/1,967 (3.4%)     |         | 27/552 (4.9%)               | 81/2,008 (4.0%)     |         |
| White                                              | 409/602 (67.9%)         | 1,297/1,967 (65.9%) |         | 399/552 (72.3%)             | 1,298/2,008 (64.6%) |         |
| Multiple Races Reported                            | 1/602 (0.2%)            | 6/1,967 (0.3%)      |         | 1/552 (0.2%)                | 4/2,008 (0.2%)      |         |
| Ethnicity                                          |                         |                     | 0.980   |                             |                     | 0.043   |
| Hispanic or Latino                                 | 88/567 (15.5%)          | 284/1,835 (15.5%)   |         | 100/524 (19.1%)             | 291/1,889 (15.4%)   |         |
| Not Hispanic or Latino                             | 479/567 (84.5%)         | 1,551/1,835 (84.5%) |         | 424/524 (80.9%)             | 1,598/1,889 (84.6%) |         |
| <b>Clinical History</b>                            |                         |                     |         |                             |                     |         |
| Hypertension                                       | 460/604 (76.2%)         | 1,434/1,975 (72.6%) | 0.084   | 462/560 (82.5%)             | 1,433/2,022 (70.9%) | <.001   |
| Diabetes                                           | 280/606 (46.2%)         | 791/1,982 (39.9%)   | 0.006   | 242/562 (43.1%)             | 851/2,029 (41.9%)   | 0.635   |
| Diabetes Treatment                                 |                         |                     | <.001   |                             |                     | 0.015   |
| Insulin Treated                                    | 86/272 (31.6%)          | 153/774 (19.8%)     |         | 73/238 (30.7%)              | 180/833 (21.6%)     |         |
| Non-Insulin Diabetes Medication                    | 153/272 (56.3%)         | 524/774 (67.7%)     |         | 137/238 (57.6%)             | 541/833 (64.9%)     |         |
| None/Diet Controlled                               | 33/272 (12.1%)          | 97/774 (12.5%)      |         | 28/238 (11.8%)              | 112/833 (13.4%)     |         |
| Prior MI                                           | 95/604 (15.7%)          | 400/1,976 (20.2%)   | 0.014   | 89/561 (15.9%)              | 407/2,021 (20.1%)   | 0.023   |
| Cigarette Smoking                                  |                         |                     | <.001   |                             |                     | <.001   |
| Never Smoked                                       | 396/606 (65.3%)         | 723/1,981 (36.5%)   |         | 360/561 (64.2%)             | 729/2,026 (36.0%)   |         |
| Former Smoker                                      | 152/606 (25.1%)         | 997/1,981 (50.3%)   |         | 149/561 (26.6%)             | 1,028/2,026 (50.7%) |         |
| Current Smoker                                     | 58/606 (9.6%)           | 261/1,981 (13.2%)   |         | 52/561 (9.3%)               | 269/2,026 (13.3%)   |         |
| Family History of Premature Coronary Heart Disease | 150/524 (28.6%)         | 428/1,704 (25.1%)   | 0.109   | 147/492 (29.9%)             | 445/1,770 (25.1%)   | 0.034   |
| Prior PCI                                          | 104/605 (17.2%)         | 447/1,981 (22.6%)   | 0.005   | 85/562 (15.1%)              | 414/2,027 (20.4%)   | 0.005   |
| Years from Most Recent PCI to Randomization        |                         |                     | 0.103   |                             |                     | 0.017   |
| N                                                  | 90                      | 390                 |         | 76                          | 364                 |         |
| Median (Q1, Q3)                                    | 4 (2, 7)                | 5 (2, 8)            |         | 3 (2, 5)                    | 4 (2, 8)            |         |
| Prior CABG                                         | 15/606 (2.5%)           | 95/1,982 (4.8%)     | 0.013   | 17/562 (3.0%)               | 76/2,029 (3.7%)     | 0.416   |
| Years from Most Recent CABG to Randomization       |                         |                     | <.001   |                             |                     | 0.742   |

| Characteristic                                        | Invasive Strategy Group |                     |         | Conservative Strategy Group |                     |         |
|-------------------------------------------------------|-------------------------|---------------------|---------|-----------------------------|---------------------|---------|
|                                                       | Women<br>(N=606)        | Men<br>(N=1,982)    | P-value | Women<br>(N=562)            | Men<br>(N=2,029)    | P-value |
| N                                                     | 11                      | 72                  |         | 16                          | 59                  |         |
| Median (Q1, Q3)                                       | 5 (2, 6)                | 9 (5, 15)           |         | 7 (3, 15)                   | 10 (5, 16)          |         |
| Prior MI or Prior PCI or Prior CABG                   | 154/603 (25.5%)         | 648/1,977 (32.8%)   | <.001   | 135/562 (24.0%)             | 633/2,020 (31.3%)   | <.001   |
| Atrial Fibrillation/Atrial Flutter                    | 27/606 (4.5%)           | 101/1,981 (5.1%)    | 0.523   | 19/560 (3.4%)               | 74/2,026 (3.7%)     | 0.770   |
| <b>Non-cardiac Vascular and Comorbidity History</b>   |                         |                     |         |                             |                     |         |
| Prior Cerebrovascular Disease*                        | 41/604 (6.8%)           | 160/1,978 (8.1%)    | 0.296   | 48/562 (8.5%)               | 128/2,021 (6.3%)    | 0.066   |
| Prior Stroke                                          | 19/606 (3.1%)           | 64/1,981 (3.2%)     | 0.907   | 21/562 (3.7%)               | 47/2,029 (2.3%)     | 0.062   |
| Stroke Type                                           |                         |                     | 0.184   |                             |                     | 0.877   |
| Hemorrhagic                                           | 1/19 (5.3%)             | 0/64 (0.0%)         |         | 1/21 (4.8%)                 | 1/47 (2.1%)         |         |
| Ischemic                                              | 16/19 (84.2%)           | 59/64 (92.2%)       |         | 16/21 (76.2%)               | 37/47 (78.7%)       |         |
| Not known                                             | 2/19 (10.5%)            | 5/64 (7.8%)         |         | 4/21 (19.0%)                | 9/47 (19.1%)        |         |
| Residual Disability from Stroke                       | 5/14 (35.7%)            | 19/57 (33.3%)       | 1.000   | 4/17 (23.5%)                | 12/38 (31.6%)       | 0.750   |
| Prior Carotid Artery Surgery or Stent                 | 17/605 (2.8%)           | 61/1,981 (3.1%)     | 0.735   | 23/562 (4.1%)               | 62/2,024 (3.1%)     | 0.226   |
| Prior Transient Ischemia Attack (TIA)                 | 15/605 (2.5%)           | 57/1,975 (2.9%)     | 0.595   | 7/562 (1.2%)                | 35/2,023 (1.7%)     | 0.422   |
| Prior Peripheral Vascular Disease (PVD)               | 26/605 (4.3%)           | 90/1,980 (4.5%)     | 0.797   | 17/560 (3.0%)               | 71/2,023 (3.5%)     | 0.584   |
| Prior Surgery or Percutaneous Procedure for PAD       | 8/24 (33.3%)            | 45/88 (51.1%)       | 0.122   | 6/16 (37.5%)                | 38/67 (56.7%)       | 0.166   |
| <b>Qualifying Stress Test Core Lab Interpretation</b> |                         |                     |         |                             |                     |         |
| Ischemia Severity by Imaging Modality                 |                         |                     |         |                             |                     |         |
| Stress Imaging Overall                                | 476/606 (78.5%)         | 1,473/1,982 (74.3%) | 0.035   | 448/562 (79.7%)             | 1,512/2,029 (74.5%) | 0.011   |
| Severity                                              |                         |                     | 0.068   |                             |                     | 0.038   |
| Severe                                                | 194/475 (40.8%)         | 654/1,466 (44.6%)   |         | 189/444 (42.6%)             | 709/1,506 (47.1%)   |         |
| Moderate                                              | 201/475 (42.3%)         | 617/1,466 (42.1%)   |         | 185/444 (41.7%)             | 598/1,506 (39.7%)   |         |
| Mild                                                  | 50/475 (10.5%)          | 113/1,466 (7.7%)    |         | 36/444 (8.1%)               | 119/1,506 (7.9%)    |         |
| None                                                  | 30/475 (6.3%)           | 82/1,466 (5.6%)     |         | 34/444 (7.7%)               | 80/1,506 (5.3%)     |         |
| Exercise Tolerance Test (ETT)                         | 130/606 (21.5%)         | 509/1,982 (25.7%)   | 0.005   | 114/562 (20.3%)             | 517/2,029 (25.5%)   | 0.002   |
| Severity                                              |                         |                     | 0.837   |                             |                     | 0.065   |
| Severe                                                | 102/120 (85.0%)         | 432/494 (87.4%)     |         | 87/106 (82.1%)              | 430/494 (87.0%)     |         |
| Moderate                                              | 13/120 (10.8%)          | 42/494 (8.5%)       |         | 9/106 (8.5%)                | 37/494 (7.5%)       |         |
| Mild                                                  | 4/120 (3.3%)            | 9/494 (1.8%)        |         | 4/106 (3.8%)                | 17/494 (3.4%)       |         |
| None                                                  | 1/120 (0.8%)            | 11/494 (2.2%)       |         | 6/106 (5.7%)                | 10/494 (2.0%)       |         |
| Nuclear                                               | 288/606 (47.5%)         | 988/1,982 (49.8%)   | 0.005   | 270/562 (48.0%)             | 1,021/2,029 (50.3%) | 0.002   |
| Severity                                              |                         |                     | <.001   |                             |                     | 0.026   |
| Severe                                                | 79/287 (27.5%)          | 395/982 (40.2%)     |         | 87/268 (32.5%)              | 407/1,018 (40.0%)   |         |
| Moderate                                              | 146/287 (50.9%)         | 450/982 (45.8%)     |         | 137/268 (51.1%)             | 470/1,018 (46.2%)   |         |
| Mild                                                  | 35/287 (12.2%)          | 74/982 (7.5%)       |         | 22/268 (8.2%)               | 83/1,018 (8.2%)     |         |
| None                                                  | 27/287 (9.4%)           | 63/982 (6.4%)       |         | 22/268 (8.2%)               | 58/1,018 (5.7%)     |         |

| Characteristic                                      | Invasive Strategy Group |                     |         | Conservative Strategy Group |                     |         |
|-----------------------------------------------------|-------------------------|---------------------|---------|-----------------------------|---------------------|---------|
|                                                     | Women<br>(N=606)        | Men<br>(N=1,982)    | P-value | Women<br>(N=562)            | Men<br>(N=2,029)    | P-value |
| Echocardiogram Severity                             | 148/606 (24.4%)         | 400/1,982 (20.2%)   | 0.005   | 143/562 (25.4%)             | 394/2,029 (19.4%)   | 0.002   |
| Severe                                              | 87/148 (58.8%)          | 218/399 (54.6%)     | 0.171   | 78/141 (55.3%)              | 243/391 (62.1%)     | 0.168   |
| Moderate                                            | 47/148 (31.8%)          | 131/399 (32.8%)     |         | 41/141 (29.1%)              | 97/391 (24.8%)      |         |
| Mild                                                | 12/148 (8.1%)           | 32/399 (8.0%)       |         | 12/141 (8.5%)               | 32/391 (8.2%)       |         |
| None                                                | 2/148 (1.4%)            | 18/399 (4.5%)       |         | 10/141 (7.1%)               | 19/391 (4.9%)       |         |
| CMR Severity                                        | 40/606 (6.6%)           | 85/1,982 (4.3%)     | 0.005   | 35/562 (6.2%)               | 97/2,029 (4.8%)     | 0.002   |
| Severe                                              | 28/40 (70.0%)           | 41/85 (48.2%)       | 0.144   | 24/35 (68.6%)               | 59/97 (60.8%)       | 0.951   |
| Moderate                                            | 8/40 (20.0%)            | 36/85 (42.4%)       |         | 7/35 (20.0%)                | 31/97 (32.0%)       |         |
| Mild                                                | 3/40 (7.5%)             | 7/85 (8.2%)         |         | 2/35 (5.7%)                 | 4/97 (4.1%)         |         |
| None                                                | 1/40 (2.5%)             | 1/85 (1.2%)         |         | 2/35 (5.7%)                 | 3/97 (3.1%)         |         |
| <b>Baseline ECG Findings<sup>†</sup></b>            |                         |                     |         |                             |                     |         |
| Q-waves: Meets UMI Criteria in 2 Leads <sup>‡</sup> | 51/570 (8.9%)           | 219/1,823 (12.0%)   | 0.043   | 43/519 (8.3%)               | 241/1,862 (12.9%)   | 0.004   |
| ST Segment Depression ≥0.5mm                        | 63/580 (10.9%)          | 169/1,899 (8.9%)    | 0.155   | 83/526 (15.8%)              | 202/1,927 (10.5%)   | <.001   |
| ST Segment Depression ≥1mm                          | 10/580 (1.7%)           | 36/1,899 (1.9%)     | 0.789   | 10/526 (1.9%)               | 31/1,927 (1.6%)     | 0.643   |
| T Wave Inversion ≥1mm                               | 54/579 (9.3%)           | 144/1,901 (7.6%)    | 0.173   | 44/527 (8.3%)               | 160/1,926 (8.3%)    | 0.975   |
| T Wave Inversion ≥3mm                               | 5/579 (0.9%)            | 30/1,901 (1.6%)     | 0.202   | 4/527 (0.8%)                | 19/1,926 (1.0%)     | 0.801   |
| Left Ventricular Hypertrophy                        | 46/564 (8.2%)           | 123/1,781 (6.9%)    | 0.317   | 47/510 (9.2%)               | 148/1,821 (8.1%)    | 0.433   |
| Left Bundle Branch Block (LBBB)                     | 13/598 (2.2%)           | 23/1,965 (1.2%)     | 0.068   | 16/553 (2.9%)               | 34/1,998 (1.7%)     | 0.074   |
| Right Bundle Branch Block (RBBB)                    | 13/598 (2.2%)           | 120/1,965 (6.1%)    | <.001   | 17/553 (3.1%)               | 109/1,998 (5.5%)    | 0.022   |
| Non-specific IVCD                                   | 2/598 (0.3%)            | 20/1,965 (1.0%)     | 0.113   | 5/553 (0.9%)                | 21/1,998 (1.1%)     | 0.761   |
| Paced Rhythm                                        | 3/598 (0.5%)            | 20/1,965 (1.0%)     | 0.241   | 5/553 (0.9%)                | 20/1,998 (1.0%)     | 0.838   |
| Atrial Fibrillation/Flutter                         | 8/598 (1.3%)            | 37/1,965 (1.9%)     | 0.374   | 8/553 (1.4%)                | 29/1,998 (1.5%)     | 0.993   |
| QTc >460 msec                                       | 19/386 (4.9%)           | 33/1,250 (2.6%)     | 0.025   | 21/354 (5.9%)               | 30/1,308 (2.3%)     | <.001   |
| <b>CCTA Findings</b>                                |                         |                     |         |                             |                     |         |
| Any Obstructive Disease ≥50% Stenosis               | 407/407 (100.0%)        | 1,517/1,519 (99.9%) | 1.000   | 380/381 (99.7%)             | 1,528/1,529 (99.9%) | 0.359   |
| Multi-vessel Disease ≥50% Stenosis                  | 245/342 (71.6%)         | 1,091/1,360 (80.2%) | <.001   | 234/322 (72.7%)             | 1,109/1,366 (81.2%) | <.001   |
| Vessels ≥50% Stenosis                               |                         |                     | <.001   |                             |                     | 0.005   |
| 0                                                   | 0/291 (0.0%)            | 2/1,199 (0.2%)      |         | 1/277 (0.4%)                | 1/1,219 (0.1%)      |         |
| 1                                                   | 96/291 (33.0%)          | 264/1,199 (22.0%)   |         | 82/277 (29.6%)              | 255/1,219 (20.9%)   |         |

| Characteristic                                                                                                           | Invasive Strategy Group |                     |         | Conservative Strategy Group |                     |         |
|--------------------------------------------------------------------------------------------------------------------------|-------------------------|---------------------|---------|-----------------------------|---------------------|---------|
|                                                                                                                          | Women<br>(N=606)        | Men<br>(N=1,982)    | P-value | Women<br>(N=562)            | Men<br>(N=2,029)    | P-value |
| 2                                                                                                                        | 93/291 (32.0%)          | 341/1,199 (28.4%)   |         | 91/277 (32.9%)              | 413/1,219 (33.9%)   |         |
| ≥3                                                                                                                       | 102/291 (35.1%)         | 592/1,199 (49.4%)   |         | 103/277 (37.2%)             | 550/1,219 (45.1%)   |         |
| <b>Specific Native Vessels ≥50% Stenosis</b>                                                                             |                         |                     |         |                             |                     |         |
| Left Main                                                                                                                | 2/411 (0.5%)            | 19/1,515 (1.3%)     | 0.282   | 2/387 (0.5%)                | 17/1,532 (1.1%)     | 0.397   |
| Left Anterior Descending (LAD)                                                                                           | 326/389 (83.8%)         | 1,265/1,448 (87.4%) | 0.132   | 324/366 (88.5%)             | 1,275/1,474 (86.5%) | 0.275   |
| Proximal LAD                                                                                                             | 166/405 (41.0%)         | 699/1,465 (47.7%)   | 0.016   | 182/378 (48.1%)             | 702/1,491 (47.1%)   | 0.711   |
| Left Circumflex                                                                                                          | 200/349 (57.3%)         | 984/1,400 (70.3%)   | <.001   | 207/344 (60.2%)             | 963/1,402 (68.7%)   | 0.011   |
| Right Coronary Artery                                                                                                    | 228/345 (66.1%)         | 950/1,339 (70.9%)   | 0.073   | 186/322 (57.8%)             | 947/1,353 (70.0%)   | <.001   |
| Any Obstructive Disease ≥70% Stenosis                                                                                    | 311/354 (87.9%)         | 1,306/1,408 (92.8%) | 0.003   | 299/337 (88.7%)             | 1,283/1,401 (91.6%) | 0.100   |
| Multi-vessel Disease ≥70% Stenosis                                                                                       | 117/307 (38.1%)         | 647/1,207 (53.6%)   | <.001   | 119/289 (41.2%)             | 646/1,244 (51.9%)   | <.001   |
| Vessels ≥70% Stenosis                                                                                                    |                         |                     | <.001   |                             |                     | 0.021   |
| 0                                                                                                                        | 43/248 (17.3%)          | 102/1,026 (9.9%)    |         | 38/238 (16.0%)              | 118/1,047 (11.3%)   |         |
| 1                                                                                                                        | 120/248 (48.4%)         | 398/1,026 (38.8%)   |         | 105/238 (44.1%)             | 404/1,047 (38.6%)   |         |
| 2                                                                                                                        | 51/248 (20.6%)          | 297/1,026 (28.9%)   |         | 62/238 (26.1%)              | 321/1,047 (30.7%)   |         |
| ≥3                                                                                                                       | 34/248 (13.7%)          | 229/1,026 (22.3%)   |         | 33/238 (13.9%)              | 204/1,047 (19.5%)   |         |
| <b>Specific Native Vessels ≥70% Stenosis</b>                                                                             |                         |                     |         |                             |                     |         |
| Left Main                                                                                                                | 1/411 (0.2%)            | 6/1,515 (0.4%)      | 1.000   | 0/387 (0.0%)                | 5/1,532 (0.3%)      | 0.590   |
| Left Anterior Descending (LAD)                                                                                           | 199/356 (55.9%)         | 871/1,351 (64.5%)   | 0.005   | 200/330 (60.6%)             | 858/1,385 (61.9%)   | 0.264   |
| Proximal LAD                                                                                                             | 70/405 (17.3%)          | 326/1,460 (22.3%)   | 0.028   | 72/378 (19.0%)              | 339/1,487 (22.8%)   | 0.116   |
| Left Circumflex                                                                                                          | 126/329 (38.3%)         | 653/1,328 (49.2%)   | 0.002   | 135/326 (41.4%)             | 630/1,333 (47.3%)   | 0.164   |
| Right Coronary Artery                                                                                                    | 137/320 (42.8%)         | 657/1,245 (52.8%)   | 0.006   | 116/305 (38.0%)             | 643/1,265 (50.8%)   | <.001   |
| Modified Duke Prognostic Index                                                                                           |                         |                     | <.001   |                             |                     | 0.010   |
| No Vessel (LAD, LCx, RCA) with at least Moderate (≥50%) Stenosis                                                         | 0/247 (0.0%)            | 2/1,023 (0.2%)      |         | 1/235 (0.4%)                | 1/1,043 (0.1%)      |         |
| 1 Vessel with at least Moderate (≥50%) Stenosis                                                                          | 25/247 (10.1%)          | 66/1,023 (6.5%)     |         | 27/235 (11.5%)              | 61/1,043 (5.8%)     |         |
| 2 Vessels with at least Moderate (≥50%) Stenosis or 1 Severe (≥70%) Stenosis                                             | 95/247 (38.5%)          | 271/1,023 (26.5%)   |         | 78/235 (33.2%)              | 306/1,043 (29.3%)   |         |
| 3 Vessels with at least Moderate (≥50%) Stenosis or 2 Severe (≥70%) Stenosis or Proximal LAD with Severe (≥70%) Stenosis | 84/247 (34.0%)          | 361/1,023 (35.3%)   |         | 79/235 (33.6%)              | 383/1,043 (36.7%)   |         |
| 3 Vessels with Severe (≥70%) Stenosis or 2 Severe (≥70%) Stenosis Including Proximal LAD                                 | 41/247 (16.6%)          | 304/1,023 (29.7%)   |         | 48/235 (20.4%)              | 275/1,043 (26.4%)   |         |
| Left Main ≥50% Stenosis                                                                                                  | 2/247 (0.8%)            | 19/1,023 (1.9%)     |         | 2/235 (0.9%)                | 17/1,043 (1.6%)     |         |
| <b>Angina &amp; Heart Failure History</b>                                                                                |                         |                     |         |                             |                     |         |
| Baseline Seattle Angina Questionnaire Angina Frequency Scale                                                             |                         |                     | <.001   |                             |                     | <.001   |
| N                                                                                                                        | 550                     | 1764                |         | 530                         | 1803                |         |
| Median (Q1, Q3)                                                                                                          | 80 (70, 100)            | 90 (70, 100)        |         | 80 (70, 100)                | 90 (70, 100)        |         |
| Baseline Seattle Angina Questionnaire Angina Frequency Scale                                                             |                         |                     | <.001   |                             |                     | <.001   |
| Daily Angina (0-30)                                                                                                      | 17/550 (3.1%)           | 44/1,764 (2.5%)     |         | 16/530 (3.0%)               | 38/1,803 (2.1%)     |         |

| Characteristic                                              | Invasive Strategy Group |                     |         | Conservative Strategy Group |                     |         |
|-------------------------------------------------------------|-------------------------|---------------------|---------|-----------------------------|---------------------|---------|
|                                                             | Women<br>(N=606)        | Men<br>(N=1,982)    | P-value | Women<br>(N=562)            | Men<br>(N=2,029)    | P-value |
| Weekly Angina (31-60)                                       | 112/550 (20.4%)         | 329/1,764 (18.7%)   |         | 109/530 (20.6%)             | 279/1,803 (15.5%)   |         |
| Monthly Angina (61-99)                                      | 274/550 (49.8%)         | 744/1,764 (42.2%)   |         | 255/530 (48.1%)             | 784/1,803 (43.5%)   |         |
| No Angina in Past Month (100)                               | 147/550 (26.7%)         | 647/1,764 (36.7%)   |         | 150/530 (28.3%)             | 702/1,803 (38.9%)   |         |
| Baseline Seattle Angina Questionnaire Summary Score         |                         |                     | <.001   |                             |                     | <.001   |
| N                                                           | 551                     | 1765                |         | 530                         | 1804                |         |
| Median (Q1, Q3)                                             | 71 (55, 85)             | 77 (63, 89)         |         | 73 (56, 84)                 | 79 (65, 92)         |         |
| Participant Has Ever Had Angina                             | 553/606 (91.3%)         | 1,776/1,982 (89.6%) | 0.237   | 515/562 (91.6%)             | 1,797/2,029 (88.6%) | 0.038   |
| Angina Over the Past Month                                  |                         |                     | <.001   |                             |                     | <.001   |
| None                                                        | 96/606 (15.8%)          | 408/1,980 (20.6%)   |         | 93/562 (16.5%)              | 438/2,029 (21.6%)   |         |
| CCS Angina Class I                                          | 144/606 (23.8%)         | 526/1,980 (26.6%)   |         | 139/562 (24.7%)             | 580/2,029 (28.6%)   |         |
| CCS Angina Class II                                         | 320/606 (52.8%)         | 961/1,980 (48.5%)   |         | 290/562 (51.6%)             | 951/2,029 (46.9%)   |         |
| CCS Angina Class III                                        | 46/606 (7.6%)           | 84/1,980 (4.2%)     |         | 40/562 (7.1%)               | 60/2,029 (3.0%)     |         |
| CCS Angina Class IV                                         | 0/606 (0.0%)            | 1/1,980 (0.1%)      |         | 0/562 (0.0%)                | 0/2,029 (0.0%)      |         |
| New Onset of Angina Over the Past 3 Months                  | 92/574 (16.0%)          | 323/1,878 (17.2%)   | 0.513   | 90/529 (17.0%)              | 350/1,937 (18.1%)   | 0.574   |
| Angina Began or Became More Frequent Over the Past 3 Months | 165/552 (29.9%)         | 515/1,773 (29.0%)   | 0.703   | 164/512 (32.0%)             | 511/1,791 (28.5%)   | 0.125   |
| Prior Heart Failure                                         | 33/606 (5.4%)           | 79/1,982 (4.0%)     | 0.122   | 28/562 (5.0%)               | 66/2,029 (3.3%)     | 0.052   |
| Ejection Fraction <sup>§</sup>                              |                         |                     | <.001   |                             |                     | <.001   |
| N                                                           | 544                     | 1775                |         | 509                         | 1809                |         |
| Median (Q1, Q3)                                             | 63 (60, 68)             | 60 (55, 64)         |         | 62 (57, 68)                 | 60 (55, 64)         |         |
| Heart Failure Over the Past Month                           |                         |                     | <.001   |                             |                     | <.001   |
| None                                                        | 346/606 (57.1%)         | 1,238/1,982 (62.5%) |         | 324/562 (57.7%)             | 1,255/2,029 (61.9%) |         |
| NYHA Class I                                                | 101/606 (16.7%)         | 398/1,982 (20.1%)   |         | 77/562 (13.7%)              | 423/2,029 (20.8%)   |         |
| NYHA Class II                                               | 159/606 (26.2%)         | 346/1,982 (17.5%)   |         | 161/562 (28.6%)             | 351/2,029 (17.3%)   |         |
| NYHA Class III                                              | 0/606 (0.0%)            | 0/1,982 (0.0%)      |         | 0/562 (0.0%)                | 0/2,029 (0.0%)      |         |
| NYHA Class IV                                               | 0/606 (0.0%)            | 0/1,982 (0.0%)      |         | 0/562 (0.0%)                | 0/2,029 (0.0%)      |         |
| <b>Vital Signs</b>                                          |                         |                     |         |                             |                     |         |
| Heart Rate (bpm)                                            |                         |                     | 0.012   |                             |                     | <.001   |
| N                                                           | 603                     | 1966                |         | 559                         | 2018                |         |
| Median (Q1, Q3)                                             | 68 (61, 75)             | 67 (60, 76)         |         | 68 (61, 76)                 | 66 (60, 74)         |         |
| Systolic Blood Pressure (mmHg)                              |                         |                     | 0.402   |                             |                     | 0.009   |
| N                                                           | 604                     | 1968                |         | 560                         | 2018                |         |
| Median (Q1, Q3)                                             | 130 (120, 144)          | 130 (120, 142)      |         | 131 (120, 146)              | 130 (120, 141)      |         |
| Diastolic Blood Pressure (mmHg)                             |                         |                     | <.001   |                             |                     | 0.039   |
| N                                                           | 604                     | 1968                |         | 560                         | 2018                |         |
| Median (Q1, Q3)                                             | 75 (70, 80)             | 78 (70, 82)         |         | 76 (70, 80)                 | 78 (70, 81)         |         |

| Characteristic                         | Invasive Strategy Group |                  |         | Conservative Strategy Group |                  |         |
|----------------------------------------|-------------------------|------------------|---------|-----------------------------|------------------|---------|
|                                        | Women<br>(N=606)        | Men<br>(N=1,982) | P-value | Women<br>(N=562)            | Men<br>(N=2,029) | P-value |
| Body Mass Index (kg/m <sup>2</sup> )   |                         |                  | 0.245   |                             |                  | <.001   |
| N                                      | 601                     | 1963             |         | 559                         | 2001             |         |
| Median (Q1, Q3)                        | 28 (25, 32)             | 28 (25, 31)      |         | 29 (25, 33)                 | 28 (25, 31)      |         |
| <b>Lab Values</b>                      |                         |                  |         |                             |                  |         |
| <b>Lipid Panel</b>                     |                         |                  |         |                             |                  |         |
| Total Cholesterol (mg/dL)              |                         |                  | <.001   |                             |                  | <.001   |
| N                                      | 589                     | 1933             |         | 554                         | 1998             |         |
| Median (Q1, Q3)                        | 167 (143, 205)          | 150 (128, 182)   |         | 166 (141, 202)              | 151 (127, 180)   |         |
| Triglycerides (mg/dL)                  |                         |                  | 0.876   |                             |                  | 0.028   |
| N                                      | 580                     | 1902             |         | 545                         | 1957             |         |
| Median (Q1, Q3)                        | 124 (96, 170)           | 124 (89, 181)    |         | 129 (97, 182)               | 124 (90, 174)    |         |
| HDL Cholesterol (mg/dL)                |                         |                  | <.001   |                             |                  | <.001   |
| N                                      | 587                     | 1916             |         | 547                         | 1973             |         |
| Median (Q1, Q3)                        | 47 (40, 58)             | 41 (35, 49)      |         | 48 (42, 58)                 | 41 (35, 49)      |         |
| LDL Cholesterol (mg/dL)                |                         |                  | <.001   |                             |                  | <.001   |
| N                                      | 574                     | 1890             |         | 542                         | 1934             |         |
| Median (Q1, Q3)                        | 90 (69, 123)            | 81 (62, 107)     |         | 91 (69, 120)                | 81 (62, 106)     |         |
| HbA1c for Diabetics (%)                |                         |                  | 0.057   |                             |                  | 0.003   |
| N                                      | 253                     | 738              |         | 225                         | 785              |         |
| Median (Q1, Q3)                        | 7 (7, 9)                | 7 (7, 8)         |         | 8 (7, 9)                    | 7 (7, 8)         |         |
| <b>Complete Blood Counts</b>           |                         |                  |         |                             |                  |         |
| Hemoglobin (g/dL)                      |                         |                  | <.001   |                             |                  | <.001   |
| N                                      | 577                     | 1889             |         | 530                         | 1891             |         |
| Median (Q1, Q3)                        | 13 (12, 14)             | 14 (13, 15)      |         | 13 (12, 14)                 | 14 (13, 15)      |         |
| Platelets (10 <sup>9</sup> /L)         |                         |                  | <.001   |                             |                  | <.001   |
| N                                      | 568                     | 1866             |         | 521                         | 1867             |         |
| Median (Q1, Q3)                        | 249 (206, 295)          | 213 (177, 249)   |         | 247 (210, 294)              | 214 (178, 253)   |         |
| WBC (10 <sup>9</sup> /L)               |                         |                  | 0.239   |                             |                  | 0.672   |
| N                                      | 572                     | 1863             |         | 522                         | 1874             |         |
| Median (Q1, Q3)                        | 7 (6, 9)                | 7 (6, 9)         |         | 7 (6, 9)                    | 7 (6, 9)         |         |
| <b>Chemistry Panel</b>                 |                         |                  |         |                             |                  |         |
| Enrollment Creatinine (mg/dL)          |                         |                  | <.001   |                             |                  | <.001   |
| N                                      | 606                     | 1982             |         | 562                         | 2029             |         |
| Median (Q1, Q3)                        | 1 (1, 1)                | 1 (1, 1)         |         | 1 (1, 1)                    | 1 (1, 1)         |         |
| Estimated GFR from Enrollment (mL/min) |                         |                  | <.001   |                             |                  | <.001   |
| N                                      | 606                     | 1982             |         | 562                         | 2029             |         |
| Median (Q1, Q3)                        | 77 (63, 92)             | 83 (69, 98)      |         | 76 (60, 92)                 | 82 (70, 98)      |         |



| Characteristic | Invasive Strategy Group |                  |         | Conservative Strategy Group |                  |         |
|----------------|-------------------------|------------------|---------|-----------------------------|------------------|---------|
|                | Women<br>(N=606)        | Men<br>(N=1,982) | P-value | Women<br>(N=562)            | Men<br>(N=2,029) | P-value |

\*Prior carotid artery surgery or stent, prior stroke, or prior TIA.

†Baseline ECG results are only reported on those ECGs with interpretable tracings as determined by the core lab.

‡Meets universal definition of MI in 2 leads in at least 1 territory (anterior, inferior, or lateral).

§Site-reported value, if available. If not available, then core-lab entered value.

Table S2. Use of CABG in Women and Men in the Invasive Strategy Group within the ISCHEMIA Trial.

| <b>Characteristic</b>                                                        | <b>Overall<br/>(N=2,588)</b> | <b>Women<br/>(N=606)</b> | <b>Men<br/>(N=1,982)</b> | <b>P-value</b> |
|------------------------------------------------------------------------------|------------------------------|--------------------------|--------------------------|----------------|
| Overall among Participants undergoing Revascularization in Invasive Strategy | 530/2,054 (25.8%)            | 93/445 (20.9%)           | 437/1,609 (27.2%)        | 0.008          |
| Duke Score=6*                                                                | 113/282 (40.1%)              | 10/33 (30.3%)            | 103/249 (41.4%)          | 0.223          |
| 3-Vessel CAD $\geq$ 50% by Angio                                             | 366/843 (43.4%)              | 58/149 (38.9%)           | 308/694 (44.4%)          | 0.223          |
| 3-Vessel CAD $\geq$ 70% by Angio                                             | 167/340 (49.1%)              | 24/54 (44.4%)            | 143/286 (50.0%)          | 0.454          |

\*3 vessels with severe ( $\geq$ 70%) stenosis or 2 severe ( $\geq$ 70%) stenosis including proximal LAD.

Table S3. Medical Therapy for Randomized Participants at End of Study by Sex in Participants Who Underwent CCTA.

| Medical Therapy Goal                                                         | All Participants<br>(N=3,913) | Women<br>(N=816) | Men<br>(N=3,097)    | P-value |
|------------------------------------------------------------------------------|-------------------------------|------------------|---------------------|---------|
| On Guideline-Directed Medical Therapy                                        |                               |                  |                     |         |
| Not Smoking                                                                  | 3,298/3,667 (89.9%)           | 703/769 (91.4%)  | 2,595/2,898 (89.5%) | 0.125   |
| Systolic Blood Pressure < 140 mmHg                                           | 2,898/3,763 (77.0%)           | 577/782 (73.8%)  | 2,321/2,981 (77.9%) | 0.016   |
| LDL-C < 70 mg/dL                                                             | 2,226/3,706 (60.1%)           | 388/773 (50.2%)  | 1,838/2,933 (62.7%) | <.001   |
| On Aspirin or Aspirin Alternative                                            | 3,553/3,671 (96.8%)           | 727/762 (95.4%)  | 2,826/2,909 (97.1%) | 0.015   |
| On High-Intensity Statin Therapy                                             | 2,466/3,785 (65.2%)           | 492/787 (62.5%)  | 1,974/2,998 (65.8%) | 0.081   |
| On ACE Inhibitor/ARB*                                                        | 2,261/3,020 (74.9%)           | 484/659 (73.4%)  | 1,777/2,361 (75.3%) | 0.341   |
| On Beta-Blocker*                                                             | 557/664 (83.9%)               | 96/110 (87.3%)   | 461/554 (83.2%)     | 0.290   |
| Number of Goals Met <sup>†</sup>                                             |                               |                  |                     | <.001   |
| 0                                                                            | 3/3,601 (0.1%)                | 1/754 (0.1%)     | 2/2,847 (0.1%)      |         |
| 1                                                                            | 77/3,601 (2.1%)               | 20/754 (2.7%)    | 57/2,847 (2.0%)     |         |
| 2                                                                            | 500/3,601 (13.9%)             | 137/754 (18.2%)  | 363/2,847 (12.8%)   |         |
| 3                                                                            | 1,498/3,601 (41.6%)           | 338/754 (44.8%)  | 1,160/2,847 (40.7%) |         |
| 4                                                                            | 1,523/3,601 (42.3%)           | 258/754 (34.2%)  | 1,265/2,847 (44.4%) |         |
| High Level of Medical Therapy Optimization <sup>‡</sup>                      | 1,523/3,601 (42.3%)           | 258/754 (34.2%)  | 1,265/2,847 (44.4%) | <.001   |
| On Aspirin or Aspirin Alternative/Other Anti-platelet Among All Participants | 3,669/3,787 (96.9%)           | 753/788 (95.6%)  | 2,916/2,999 (97.2%) | 0.016   |
| LDL-C < 70 mg/dL and on a Statin                                             | 2,199/3,698 (59.5%)           | 382/769 (49.7%)  | 1,817/2,929 (62.0%) | <.001   |
| On ACE Inhibitor/ARB Among All Participants                                  | 2,606/3,786 (68.8%)           | 539/788 (68.4%)  | 2,067/2,998 (68.9%) | 0.769   |
| On Statin                                                                    | 3,595/3,787 (94.9%)           | 734/788 (93.1%)  | 2,861/2,999 (95.4%) | 0.010   |
| On Anti-anginal Medications <sup>§</sup>                                     | 3,420/3,788 (90.3%)           | 712/788 (90.4%)  | 2,708/3,000 (90.3%) | 0.940   |
| Number of Anti-anginal Medications <sup>§</sup>                              |                               |                  |                     | 0.007   |
| 1                                                                            | 1,748/3,420 (51.1%)           | 331/712 (46.5%)  | 1,417/2,708 (52.3%) |         |
| 2                                                                            | 1,213/3,420 (35.5%)           | 266/712 (37.4%)  | 947/2,708 (35.0%)   |         |
| 3                                                                            | 365/3,420 (10.7%)             | 95/712 (13.3%)   | 270/2,708 (10.0%)   |         |
| 4                                                                            | 82/3,420 (2.4%)               | 15/712 (2.1%)    | 67/2,708 (2.5%)     |         |
| 5                                                                            | 12/3,420 (0.4%)               | 5/712 (0.7%)     | 7/2,708 (0.3%)      |         |
| HbA1c < 8%                                                                   | 2,460/2,908 (84.6%)           | 474/593 (79.9%)  | 1,986/2,315 (85.8%) | <.001   |
| Adherent to Medications Based on Morisky-Green-Levine Assessment             | 3,022/3,705 (81.6%)           | 619/776 (79.8%)  | 2,403/2,929 (82.0%) | 0.146   |

| Medical Therapy Goal | All Participants<br>(N=3,913) | Women<br>(N=816) | Men<br>(N=3,097) | P-value |
|----------------------|-------------------------------|------------------|------------------|---------|
|----------------------|-------------------------------|------------------|------------------|---------|

\*Participants who are not indicated for ACE Inhibitor/ARBs or Beta-Blockers are counted as having missing data for the individual goals.

+The following OMT goals contribute to the Number of Goals Met: not smoking, systolic blood pressure < 140 mm/Hg, LDL-C < 70 mg/dL and on any statin, and on

aspirin or other antiplatelet or anticoagulant contribute to this count. Number of Goals Met is missing if any of the individual goals are missing.

#High Level of Medical Therapy Optimization is defined as a participant meeting all of the following goals: not smoking, systolic blood pressure < 140 mm/Hg, LDL-C < 70 mg/dL and on any statin, and on aspirin or other antiplatelet or anticoagulant. High level of medical therapy optimization is missing if any of the individual goals are missing.

§Includes Beta Blocker, Calcium Channel Blocker, Long-acting Nitrate, Ranolazine, Trimetazadine, Ivabradine, Nicorandil and other anti-anginal medications marked as "Unknown".

|| For each individual GDMT goal, the last visit is defined as the latest visit (at least 12 months after randomization) where the goal is evaluable. If the latest visit where the goal is evaluable is less than 12 months after randomization then the individual OMT goal is missing.

#A total of 3,913 randomized participants had a CCTA performed (96.7% were protocol CCTA and 3.3% were non-protocol CCTA).

Abbreviations defined: GDMT – guideline-directed medical therapy; LDL-C - low-density lipoprotein cholesterol; ACE - Angiotensin-converting enzyme; ARB - angiotensin-receptor blocker; HbA1c - Hemoglobin A1C

Table S4. Medical Therapy for Randomized Participants at End of Study by Sex\* in the Subgroup of Invasive Strategy Group Participants Who Underwent Cardiac Catheterization and had at least One Diseased Vessel  $\geq 50\%$  Stenosis\*\*.

| Medical Therapy Goal                                                         | All Participants<br>(N=2,177) | Women<br>(N=479) | Men<br>(N=1,698)    | P-value         |
|------------------------------------------------------------------------------|-------------------------------|------------------|---------------------|-----------------|
| <b>Specific Goals</b>                                                        |                               |                  |                     |                 |
| Not Smoking                                                                  | 1,851/2,045 (90.5%)           | 408/446 (91.5%)  | 1,443/1,599 (90.2%) | 0.431           |
| Systolic Blood Pressure < 140 mmHg                                           | 1,625/2,098 (77.5%)           | 344/458 (75.1%)  | 1,281/1,640 (78.1%) | 0.174           |
| LDL-C < 70 mg/dL                                                             | 1,245/2,065 (60.3%)           | 241/454 (53.1%)  | 1,004/1,611 (62.3%) | <.001           |
| On Aspirin or Aspirin Alternative                                            | 1,995/2,039 (97.8%)           | 427/440 (97.0%)  | 1,568/1,599 (98.1%) | 0.194           |
| On High-Intensity Statin                                                     | 1,379/2,109 (65.4%)           | 293/461 (63.6%)  | 1,086/1,648 (65.9%) | 0.350           |
| On ACE Inhibitor/ARB*                                                        | 1,303/1,755 (74.2%)           | 299/404 (74.0%)  | 1,004/1,351 (74.3%) | 0.902           |
| On Beta-Blocker*                                                             | 371/431 (86.1%)               | 70/79 (88.6%)    | 301/352 (85.5%)     | 0.472           |
| <b>Number of Goals Met†</b>                                                  |                               |                  |                     | <b>0.004</b>    |
| 0                                                                            | 0/2,006 (0.0%)                | 0/440 (0.0%)     | 0/1,566 (0.0%)      |                 |
| 1                                                                            | 32/2,006 (1.6%)               | 7/440 (1.6%)     | 25/1,566 (1.6%)     |                 |
| 2                                                                            | 282/2,006 (14.1%)             | 76/440 (17.3%)   | 206/1,566 (13.2%)   |                 |
| 3                                                                            | 831/2,006 (41.4%)             | 200/440 (45.5%)  | 631/1,566 (40.3%)   |                 |
| 4                                                                            | 861/2,006 (42.9%)             | 157/440 (35.7%)  | 704/1,566 (45.0%)   |                 |
| <b>High Level of Medical Therapy Optimization‡</b>                           | 861/2,006 (42.9%)             | 157/440 (35.7%)  | 704/1,566 (45.0%)   | <b>&lt;.001</b> |
| On Aspirin or Aspirin Alternative/Other Anti-platelet Among All Participants | 2,065/2,109 (97.9%)           | 448/461 (97.2%)  | 1,617/1,648 (98.1%) | 0.212           |
| LDL-C < 70 mg/dL and on a Statin                                             | 1,224/2,064 (59.3%)           | 234/453 (51.7%)  | 990/1,611 (61.5%)   | <.001           |
| On ACE Inhibitor/ARB Among All Participants                                  | 1,484/2,109 (70.4%)           | 334/461 (72.5%)  | 1,150/1,648 (69.8%) | 0.267           |
| On Statin                                                                    | 2,026/2,110 (96.0%)           | 429/461 (93.1%)  | 1,597/1,649 (96.8%) | <.001           |
| On Anti-anginal Medications§                                                 | 1,897/2,110 (89.9%)           | 417/461 (90.5%)  | 1,480/1,649 (89.8%) | 0.657           |
| <b>Number of Anti-anginal Medications§</b>                                   |                               |                  |                     | <b>0.031</b>    |
| 1                                                                            | 1,089/1,897 (57.4%)           | 222/417 (53.2%)  | 867/1,480 (58.6%)   |                 |
| 2                                                                            | 641/1,897 (33.8%)             | 154/417 (36.9%)  | 487/1,480 (32.9%)   |                 |
| 3                                                                            | 145/1,897 (7.6%)              | 39/417 (9.4%)    | 106/1,480 (7.2%)    |                 |
| 4                                                                            | 20/1,897 (1.1%)               | 1/417 (0.2%)     | 19/1,480 (1.3%)     |                 |
| 5                                                                            | 2/1,897 (0.1%)                | 1/417 (0.2%)     | 1/1,480 (0.1%)      |                 |
| HbA1c < 8%                                                                   | 1,340/1,618 (82.8%)           | 280/359 (78.0%)  | 1,060/1,259 (84.2%) | 0.006           |

| Medical Therapy Goal                                             | All Participants<br>(N=2,177) | Women<br>(N=479) | Men<br>(N=1,698)    | P-value |
|------------------------------------------------------------------|-------------------------------|------------------|---------------------|---------|
| Adherent to Medications Based on Morisky-Green-Levine Assessment | 1,722/2,069 (83.2%)           | 366/452 (81.0%)  | 1,356/1,617 (83.9%) | 0.147   |

\*Participants who are not indicated for ACE Inhibitor/ARBs or Beta-Blockers are counted as having missing data for the individual goals.

+The following OMT goals contribute to the Number of Goals Met: not smoking, systolic blood pressure < 140 mm/Hg, LDL-C < 70 mg/dL and on any statin, and on

aspirin or other antiplatelet or anticoagulant contribute to this count. Number of Goals Met is missing if any of the individual goals are missing.

#High Level of Medical Therapy Optimization is defined as a participant meeting all of the following goals: not smoking, systolic blood pressure < 140 mm/Hg, LDL-C < 70 mg/dL and on any statin, and on aspirin or other antiplatelet or anticoagulant. High level of medical therapy optimization is missing if any of the individual goals are missing.

§Includes Beta Blocker, Calcium Channel Blocker, Long-acting Nitrate, Ranolazine, Trimetazadine, Ivabradine, Nicorandil and other anti-anginal medications marked as "Unknown".

|| For each individual GDMT goal, the last visit is defined as the latest visit (at least 12 months after randomization) where the goal is evaluable. If the latest visit where the goal is evaluable is less than 12 months after randomization then the individual OMT goal is missing.

#A total of 3,913 randomized participants had a CCTA performed (96.7% were protocol CCTA and 3.3% were non-protocol CCTA).

Abbreviations defined: GDMT – guideline-directed medical therapy; LDL-C - low-density lipoprotein cholesterol; ACE - Angiotensin-converting enzyme; ARB - angiotensin-receptor blocker; HbA1c - Hemoglobin A1C

Table S5. Interaction between Sex and CAD Severity on Coronary Computed Tomography Angiography and MI.

| Event             | Number of Diseased Vessels $\geq 50\%$                                       |                     | Number of Diseased Vessels $\geq 70\%$                                                                  |                     |
|-------------------|------------------------------------------------------------------------------|---------------------|---------------------------------------------------------------------------------------------------------|---------------------|
|                   | HR (95% CI)*                                                                 | Interaction P-value | HR (95% CI)*                                                                                            | Interaction P-value |
| MI                |                                                                              | 0.018               |                                                                                                         | 0.052               |
|                   | One: 0.36 (0.13, 1.04)<br>Two: 0.44 (0.19, 1.03)<br>Three: 1.25 (0.82, 1.92) |                     | Zero: 0.21 (0.03, 1.61)<br>One: 0.74 (0.39, 1.38)<br>Two: 0.56 (0.22, 1.41)<br>Three: 1.77 (0.93, 3.37) |                     |
| Non-procedural MI |                                                                              | 0.028               |                                                                                                         | 0.022               |
|                   | One: 0.64 (0.22, 1.88)<br>Two: 0.65 (0.27, 1.52)<br>Three: 1.96 (1.21, 3.17) |                     | Zero: 0.29 (0.04, 2.26)<br>One: 1.20 (0.62, 2.32)<br>Two: 0.63 (0.22, 1.78)<br>Three: 3.06 (1.51, 6.22) |                     |

\*Hazard ratios compare women vs. men at each level of number of diseased vessels by CCTA. Nonprocedural MI excludes type 4a and 5.

†Note: Sex-by-CAD-severity interactions were not significant for the primary outcome (50%:  $p=0.188$ , 70%:  $p=0.210$ ), CV death or MI (50%:  $p=0.065$ , 70%:  $p=0.086$ ) and all-cause mortality (50%:  $p=0.186$ , 70%:  $p=0.397$ ). Zero vessel disease based on a 50% stenosis threshold was not evaluated due to low sample size,  $N=4$ .

‡Sex-by-CAD-Severity interactions were not significant for the primary outcome ( $p=0.342$ ), CV death or MI ( $p=0.141$ ) or all-cause mortality ( $p=0.339$ ). Zero vessel disease based on a 50% stenosis threshold was not evaluated due to low sample size,  $N=4$ .

Abbreviations: MI = myocardial infarction, HR= hazard ratio

Table S6. Estimated Treatment Hazard Ratios (INV vs. CON) by Sex for Clinical Outcomes.

| <b>Event</b>                                                                                                | <b>Women<br/>Adjusted HR (95%<br/>CI)*</b> | <b>Men<br/>Adjusted HR (95%<br/>CI)*</b> | <b>Interaction<br/>P-value</b> |
|-------------------------------------------------------------------------------------------------------------|--------------------------------------------|------------------------------------------|--------------------------------|
| Cardiovascular Death, MI, Hospitalization for Unstable Angina or Heart Failure, Resuscitated Cardiac Arrest | 1.05 (0.76, 1.45)                          | 0.89 (0.75, 1.06)                        | 0.378                          |
| Cardiovascular Death or MI                                                                                  | 0.93 (0.66, 1.31)                          | 0.89 (0.74, 1.07)                        | 0.819                          |
| All-cause Death                                                                                             | 1.29 (0.82, 2.03)                          | 0.98 (0.75, 1.28)                        | 0.313                          |
| Cardiovascular Death                                                                                        | 1.11 (0.66, 1.85)                          | 0.79 (0.57, 1.10)                        | 0.278                          |
| MI                                                                                                          | 0.93 (0.61, 1.40)                          | 0.92 (0.75, 1.13)                        | 0.970                          |
| Non-procedural MI (Type 1, 2, 4b, 4c)                                                                       | 0.88 (0.56, 1.39)                          | 0.61 (0.48, 0.79)                        | 0.176                          |
| Procedural MI (Type 4a, 5)                                                                                  | 2.53 (0.67, 9.55)                          | 3.04 (1.85, 4.99)                        | 0.801                          |
| Stroke                                                                                                      | 2.80 (1.09, 7.19)                          | 0.93 (0.56, 1.54)                        | 0.044                          |
| Hospitalization for Heart Failure                                                                           | 2.46 (1.04, 5.78)                          | 2.14 (1.20, 3.82)                        | 0.794                          |

\*Hazard ratios compare INV vs. CON. Models are adjusted for age at randomization, diabetes, left ventricular ejection fraction, and eGFR. Continuous variables are modeled as restricted cubic splines with knots at the 10<sup>th</sup>, 50<sup>th</sup>, and 90<sup>th</sup> percentiles of each variables empirical distribution. MI was defined according to the primary trial definition.

Abbreviations: INV = invasive group, CON = conservative group, HR = hazard ratio, CI = confidence interval, MI = myocardial infarction



Figure S1. Unadjusted Cumulative Incidence Plot of Catheterization for Participants Randomized to the CON Treatment Arm by Indication for Procedure.

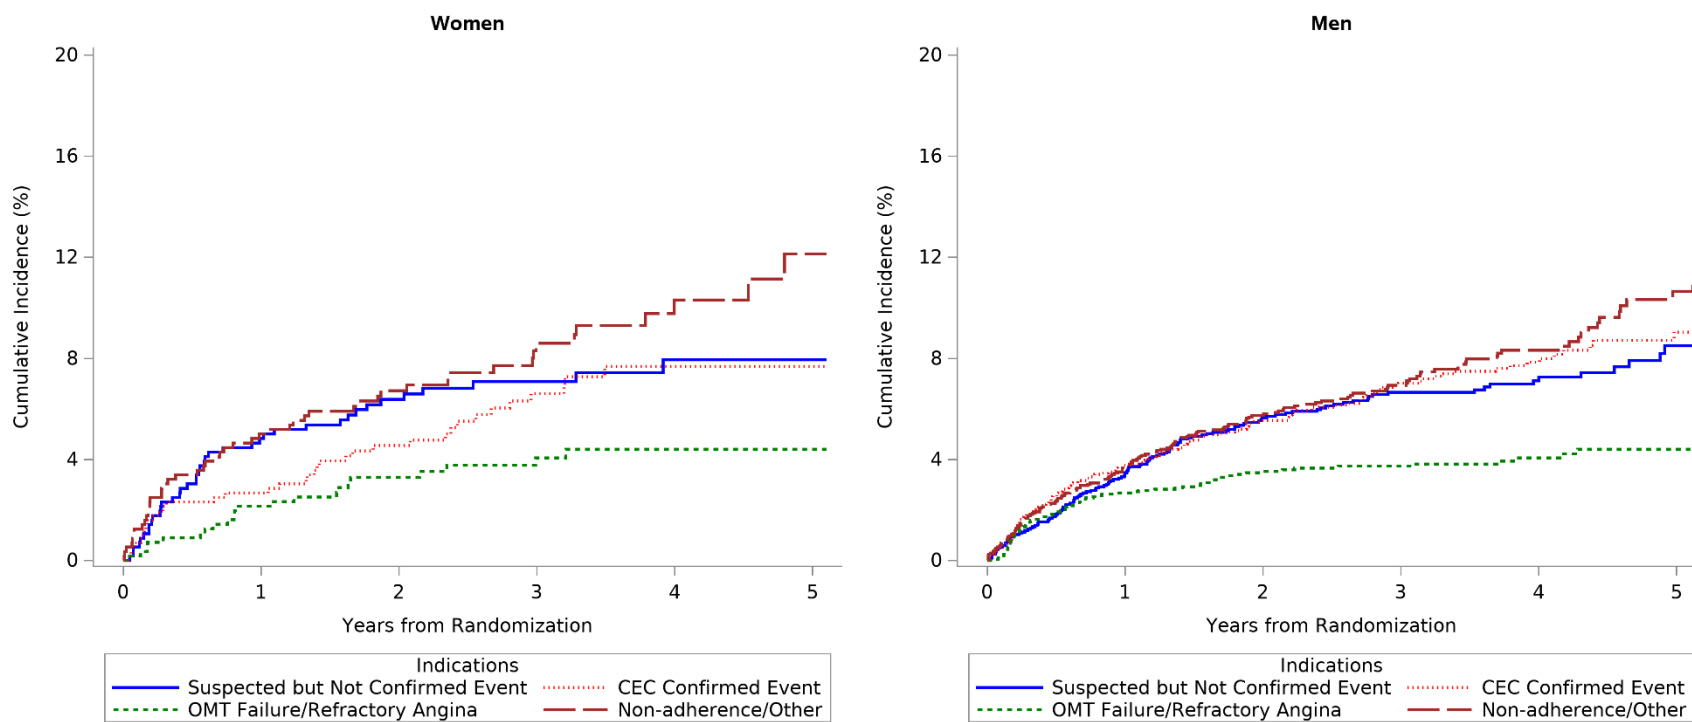

CON = conservative group, CEC = clinical events adjudication committee, OMT = optimal medical therapy

Figure S2. Unadjusted Cumulative Incidence Plot of Revascularization for Participants Randomized to the CON Treatment Arm by Indication for Procedure.

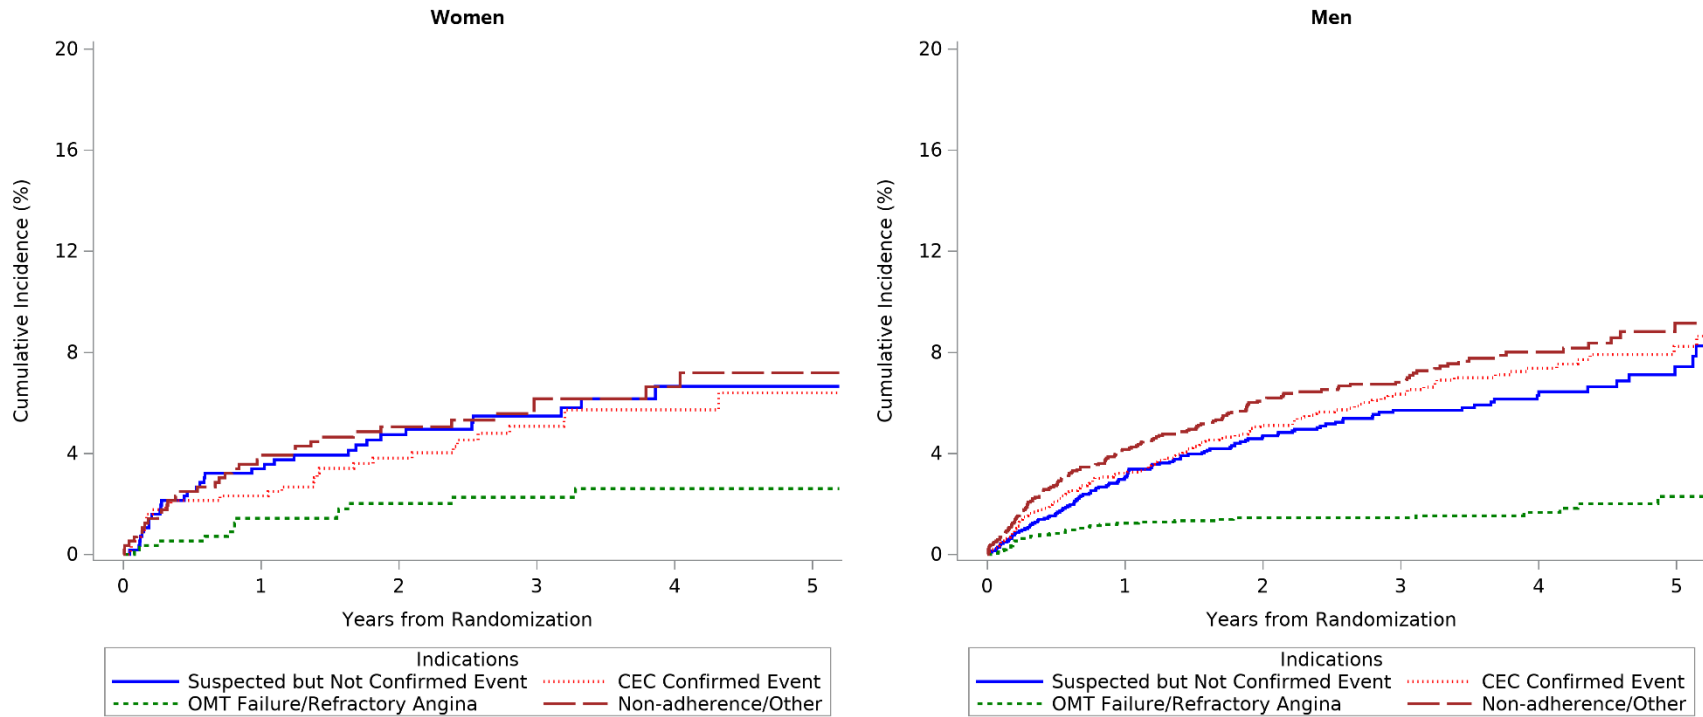

CON = conservative group, CEC = clinical events adjudication committee, OMT = optimal medical therapy
